# Supplementary material for: MicroRNA Analysis of Human Stroke Brain Tissue Resected during Decompressive Craniectomy/Stroke-Ectomy Surgery
Source: MDPI journal article supplement (doi:10.3390/genes12121860), 2021-11-23
Supplement: s1 [file s1]

## **Supplemental Materials**

Supplemental Tables S1 and S2

Online Supplemental Figures

S1-S3 References: 52-61

**Supplemental Table S1, stroke and non-stroke control patient samples used for analyses. ICA - internal carotid artery; MCA - middle cerebral artery; LKN - last known normal time; L - left; R - right.**

| <b>Stroke patients</b> | <b>Artery involved</b> | <b>Samples collected from</b> | <b>Time after stroke onset/<br/>LKN</b> | <b>Age</b> | <b>Sex</b> |
|------------------------|------------------------|-------------------------------|-----------------------------------------|------------|------------|
| <b>S1</b>              | <b>L ICA</b>           | <b>L temporal lobe</b>        | <b>48 hours</b>                         | <b>57</b>  | <b>F</b>   |
| <b>S2</b>              | <b>R ICA</b>           | <b>R temporal lobe</b>        | <b>72 hours</b>                         | <b>23</b>  | <b>M</b>   |
| <b>S3</b>              | <b>R MCA</b>           | <b>R temporal lobe</b>        | <b>17 hours</b>                         | <b>59</b>  | <b>M</b>   |
| <b>S4</b>              | <b>L MCA</b>           | <b>L temporal lobe</b>        | <b>28 hours</b>                         | <b>50</b>  | <b>M</b>   |
| <b>S5</b>              | <b>R MCA</b>           | <b>R temporal lobe</b>        | <b>60 hours</b>                         | <b>38</b>  | <b>M</b>   |

| <b>Non-stroke controls</b> | <b>Samples collected from</b> | <b>Diagnosis of tissue</b> | <b>Diagnosis of case</b> | <b>Age</b> | <b>Sex</b> |
|----------------------------|-------------------------------|----------------------------|--------------------------|------------|------------|
| <b>C1</b>                  | <b>R temporal lobe</b>        | <b>Normal</b>              | <b>Oligoastrocytoma</b>  | <b>44</b>  | <b>M</b>   |
| <b>C2</b>                  | <b>L temporal lobe</b>        | <b>Normal</b>              | <b>Glioblastoma</b>      | <b>64</b>  | <b>M</b>   |
| <b>C3</b>                  | <b>R temporal lobe</b>        | <b>Normal</b>              | <b>Glioblastoma</b>      | <b>52</b>  | <b>F</b>   |

**Supplemental Table S2, stroke-related miRNAs dysregulated in human stroke brain tissue**

| <b>Name</b>             | <b>Fold-change</b> | <b>P-value</b>  | <b>FDR P-value</b> | <b>Reported in:</b> |
|-------------------------|--------------------|-----------------|--------------------|---------------------|
| <b>hsa-miR-1246</b>     | <b>334.46</b>      | <b>0</b>        | <b>0</b>           | <b>[40-42]</b>      |
| <b>hsa-miR-4516</b>     | <b>32.68</b>       | <b>0</b>        | <b>0</b>           | <b>[43]</b>         |
| <b>hsa-miR-182-5p</b>   | <b>15.44</b>       | <b>3.98E-06</b> | <b>0.0002</b>      | <b>[18]</b>         |
| <b>hsa-miR-183-3p</b>   | <b>11.02</b>       | <b>0.0207</b>   | <b>0.2654</b>      | <b>[18]</b>         |
| <b>hsa-miR-320d</b>     | <b>10.80</b>       | <b>5.73E-11</b> | <b>8.67E-09</b>    | <b>[44,48]</b>      |
| <b>hsa-miR-1255b-5p</b> | <b>9.53</b>        | <b>0.0001</b>   | <b>0.0059</b>      | <b>[49]</b>         |
| <b>hsa-miR-320c</b>     | <b>9.29</b>        | <b>2.30E-11</b> | <b>3.79E-09</b>    | <b>[44]</b>         |
| <b>hsa-miR-183-5p</b>   | <b>8.87</b>        | <b>0.0001</b>   | <b>0.0059</b>      | <b>[18]</b>         |
| <b>hsa-miR-96-5p</b>    | <b>8.45</b>        | <b>0.0004</b>   | <b>0.0144</b>      | <b>[18]</b>         |
| <b>hsa-miR-196b-5p</b>  | <b>5.64</b>        | <b>0.0011</b>   | <b>0.0347</b>      | <b>[18]</b>         |
| <b>hsa-miR-15b-5p</b>   | <b>3.54</b>        | <b>0.0025</b>   | <b>0.0611</b>      | <b>[45]</b>         |
| <b>hsa-miR-1299</b>     | <b>3.46</b>        | <b>0.0163</b>   | <b>0.2278</b>      | <b>[18,41]</b>      |
| <b>hsa-miR-18a-5p</b>   | <b>3.33</b>        | <b>0.0026</b>   | <b>0.0628</b>      | <b>[41]</b>         |
| <b>hsa-miR-204-3p</b>   | <b>3.23</b>        | <b>0.0008</b>   | <b>0.0251</b>      | <b>[46]</b>         |
| <b>hsa-miR-17-5p</b>    | <b>3.20</b>        | <b>0.0005</b>   | <b>0.0180</b>      | <b>[45]</b>         |
| <b>hsa-miR-106b-3p</b>  | <b>3.12</b>        | <b>0.0032</b>   | <b>0.0720</b>      | <b>[41]</b>         |
| <b>hsa-miR-224-5p</b>   | <b>3.11</b>        | <b>0.0028</b>   | <b>0.0666</b>      | <b>[41]</b>         |
| <b>hsa-miR-101-2-5p</b> | <b>3.07</b>        | <b>0.0394</b>   | <b>0.3912</b>      | <b>[50,51]</b>      |
| <b>hsa-miR-15b-3p</b>   | <b>3.07</b>        | <b>0.0186</b>   | <b>0.2540</b>      | <b>[45]</b>         |
| <b>hsa-miR-18a-3p</b>   | <b>2.91</b>        | <b>0.0303</b>   | <b>0.3438</b>      | <b>[41]</b>         |
| <b>hsa-miR-193b-5p</b>  | <b>2.87</b>        | <b>0.0004</b>   | <b>0.0142</b>      | <b>[51]</b>         |
| <b>hsa-miR-483-5p</b>   | <b>2.83</b>        | <b>0.0153</b>   | <b>0.2164</b>      | <b>[14]</b>         |
| <b>hsa-miR-629-3p</b>   | <b>2.83</b>        | <b>0.0173</b>   | <b>0.2393</b>      | <b>[18]</b>         |
| <b>hsa-miR-16-5p</b>    | <b>2.78</b>        | <b>0.0002</b>   | <b>0.0090</b>      | <b>[47]</b>         |
| <b>hsa-miR-18b-5p</b>   | <b>2.73</b>        | <b>0.0350</b>   | <b>0.3741</b>      | <b>[41]</b>         |
| <b>hsa-miR-187-5p</b>   | <b>2.70</b>        | <b>0.0401</b>   | <b>0.3954</b>      | <b>[18]</b>         |
| <b>hsa-miR-484</b>      | <b>2.60</b>        | <b>0.0025</b>   | <b>0.0610</b>      | <b>[47]</b>         |
| <b>hsa-miR-106b-5p</b>  | <b>2.59</b>        | <b>0.0221</b>   | <b>0.2770</b>      | <b>[41]</b>         |
| <b>hsa-miR-20a-5p</b>   | <b>2.56</b>        | <b>0.0116</b>   | <b>0.1902</b>      | <b>[50]</b>         |
| <b>hsa-miR-1908-5p</b>  | <b>2.55</b>        | <b>0.0394</b>   | <b>0.3912</b>      | <b>[52]</b>         |
| <b>hsa-miR-320b</b>     | <b>2.54</b>        | <b>0.0017</b>   | <b>0.0465</b>      | <b>[44]</b>         |
| <b>hsa-miR-574-5p</b>   | <b>2.53</b>        | <b>0.0082</b>   | <b>0.1443</b>      | <b>[18]</b>         |
| <b>hsa-miR-106a-5p</b>  | <b>2.47</b>        | <b>0.0146</b>   | <b>0.2164</b>      | <b>[41]</b>         |
| <b>hsa-miR-423-5p</b>   | <b>2.46</b>        | <b>0.0015</b>   | <b>0.0416</b>      | <b>[41]</b>         |
| <b>hsa-miR-320a-3p</b>  | <b>2.41</b>        | <b>0.0008</b>   | <b>0.0263</b>      | <b>[44]</b>         |
| <b>hsa-miR-21-5p</b>    | <b>2.39</b>        | <b>0.0071</b>   | <b>0.1329</b>      | <b>[53]</b>         |
| <b>hsa-miR-502-3p</b>   | <b>2.37</b>        | <b>0.0016</b>   | <b>0.0455</b>      | <b>[18]</b>         |
| <b>hsa-miR-505-5p</b>   | <b>2.34</b>        | <b>0.0014</b>   | <b>0.0416</b>      | <b>[18]</b>         |
| <b>hsa-miR-576-3p</b>   | <b>2.34</b>        | <b>0.0288</b>   | <b>0.3309</b>      | <b>[18]</b>         |
| <b>hsa-miR-129-1-3p</b> | <b>2.24</b>        | <b>0.0085</b>   | <b>0.1484</b>      | <b>[18]</b>         |
| <b>hsa-miR-93-5p</b>    | <b>2.21</b>        | <b>0.0346</b>   | <b>0.3710</b>      | <b>[18]</b>         |
| <b>hsa-miR-652-3p</b>   | <b>2.19</b>        | <b>0.0015</b>   | <b>0.0416</b>      | <b>[18]</b>         |

|                          |               |                 |                 |                |
|--------------------------|---------------|-----------------|-----------------|----------------|
| <b>hsa-miR-194-5p</b>    | <b>2.12</b>   | <b>0.0228</b>   | <b>0.2775</b>   | <b>[54]</b>    |
| <b>hsa-miR-877-5p</b>    | <b>2.11</b>   | <b>0.0048</b>   | <b>0.0987</b>   | <b>[48]</b>    |
| <b>hsa-miR-92a-3p</b>    | <b>2.04</b>   | <b>0.0226</b>   | <b>0.2775</b>   | <b>[45]</b>    |
| <b>hsa-miR-574-3p</b>    | <b>2.04</b>   | <b>0.0064</b>   | <b>0.1240</b>   | <b>[18,55]</b> |
| <b>hsa-miR-501-3p</b>    | <b>2.03</b>   | <b>0.03370</b>  | <b>0.3641</b>   | <b>[18]</b>    |
| <b>hsa-let-7d-3p</b>     | <b>2.01</b>   | <b>0.01899</b>  | <b>0.2554</b>   | <b>[18]</b>    |
| <b>hsa-miR-625-5p</b>    | <b>1.99</b>   | <b>0.01113</b>  | <b>0.1854</b>   | <b>[18]</b>    |
| <b>hsa-miR-193a-5p</b>   | <b>1.97</b>   | <b>0.02501</b>  | <b>0.2987</b>   | <b>[51]</b>    |
| <b>hsa-miR-27a-3p</b>    | <b>1.95</b>   | <b>0.02750</b>  | <b>0.3199</b>   | <b>[50]</b>    |
| <b>hsa-miR-146b-3p</b>   | <b>1.89</b>   | <b>0.02587</b>  | <b>0.3069</b>   | <b>[56]</b>    |
| <b>hsa-miR-941</b>       | <b>1.88</b>   | <b>0.03576</b>  | <b>0.3753</b>   | <b>[48]</b>    |
| <b>hsa-miR-193b-3p</b>   | <b>1.84</b>   | <b>0.033228</b> | <b>0.3633</b>   | <b>[51]</b>    |
| <b>hsa-miR-184</b>       | <b>1.81</b>   | <b>0.026221</b> | <b>0.3090</b>   | <b>[14]</b>    |
| <b>hsa-miR-362-5p</b>    | <b>1.80</b>   | <b>0.032322</b> | <b>0.3577</b>   | <b>[57]</b>    |
| <b>hsa-miR-155-5p</b>    | <b>1.73</b>   | <b>0.041987</b> | <b>0.4119</b>   | <b>[57]</b>    |
| <b>hsa-miR-625-3p</b>    | <b>1.68</b>   | <b>0.047847</b> | <b>0.4408</b>   | <b>[18]</b>    |
| <b>hsa-miR-376a-2-5p</b> | <b>-1.51</b>  | <b>0.070770</b> | <b>0.5359</b>   | <b>[58]</b>    |
| <b>hsa-miR-29a-5p</b>    | <b>-1.67</b>  | <b>0.045963</b> | <b>0.4300</b>   | <b>[14,42]</b> |
| <b>hsa-let-7f-2-3p</b>   | <b>-1.69</b>  | <b>0.048431</b> | <b>0.4422</b>   | <b>[59]</b>    |
| <b>hsa-let-7c-3p</b>     | <b>-1.73</b>  | <b>0.022499</b> | <b>0.2775</b>   | <b>[18,42]</b> |
| <b>hsa-miR-9-5p</b>      | <b>-1.76</b>  | <b>0.002994</b> | <b>0.0697</b>   | <b>[60]</b>    |
| <b>hsa-miR-135a-5p</b>   | <b>-1.79</b>  | <b>0.037469</b> | <b>0.3821</b>   | <b>[18]</b>    |
| <b>hsa-miR-409-5p</b>    | <b>-1.82</b>  | <b>0.028192</b> | <b>0.3260</b>   | <b>[58]</b>    |
| <b>hsa-miR-218-5p</b>    | <b>-1.88</b>  | <b>0.009462</b> | <b>0.1620</b>   | <b>[50]</b>    |
| <b>hsa-miR-455-5p</b>    | <b>-1.90</b>  | <b>0.018269</b> | <b>0.2512</b>   | <b>[61]</b>    |
| <b>hsa-miR-7-5p</b>      | <b>-2.03</b>  | <b>0.002281</b> | <b>0.0587</b>   | <b>[59,18]</b> |
| <b>hsa-miR-106a-3p</b>   | <b>-2.07</b>  | <b>0.019659</b> | <b>0.2604</b>   | <b>[41]</b>    |
| <b>hsa-miR-376c-5p</b>   | <b>-2.10</b>  | <b>0.004647</b> | <b>0.0980</b>   | <b>[58]</b>    |
| <b>hsa-miR-432-3p</b>    | <b>-2.20</b>  | <b>0.048482</b> | <b>0.4422</b>   | <b>[58]</b>    |
| <b>hsa-miR-542-3p</b>    | <b>-2.39</b>  | <b>0.003690</b> | <b>0.0817</b>   | <b>[61]</b>    |
| <b>hsa-miR-135a-3p</b>   | <b>-9.00</b>  | <b>0.000536</b> | <b>0.0180</b>   | <b>[18]</b>    |
| <b>hsa-miR-196a-3p</b>   | <b>-17.60</b> | <b>0.003520</b> | <b>0.0789</b>   | <b>[18]</b>    |
| <b>hsa-miR-196a-5p</b>   | <b>-31.65</b> | <b>3.33E-16</b> | <b>1.01E-13</b> | <b>[18]</b>    |



# Supplemental Figure S1

Patient 1

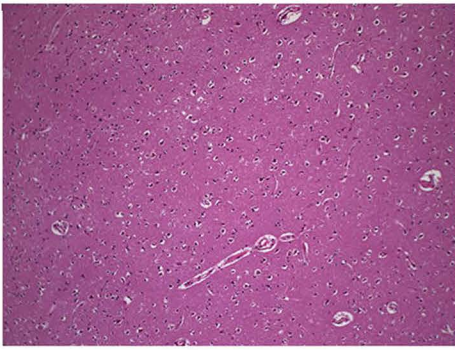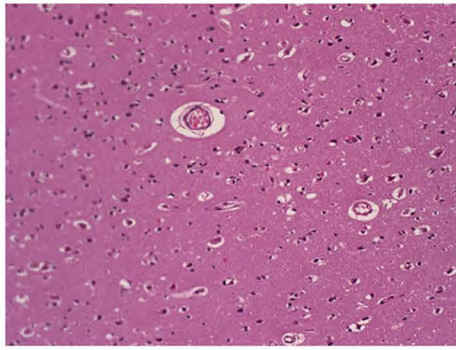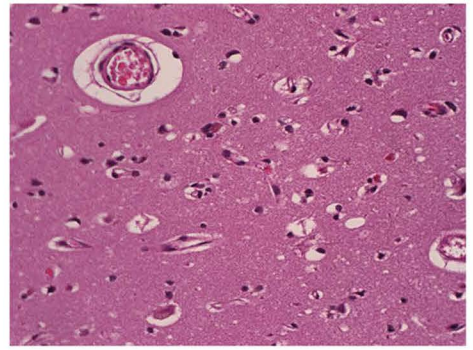

Patient 2

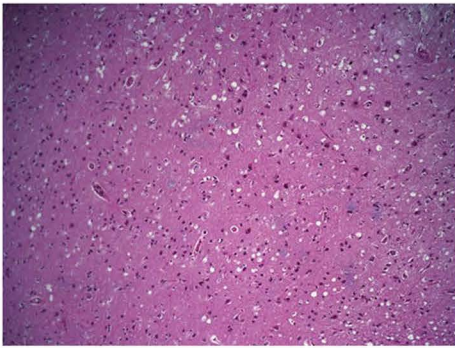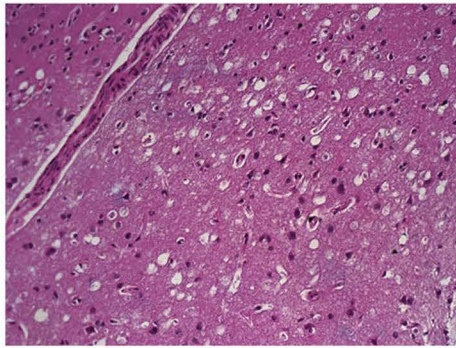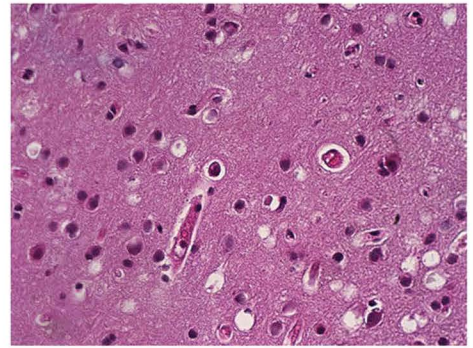

Patient 3

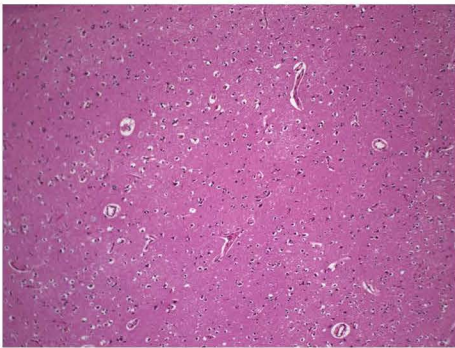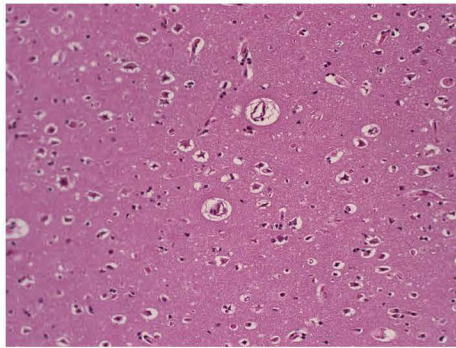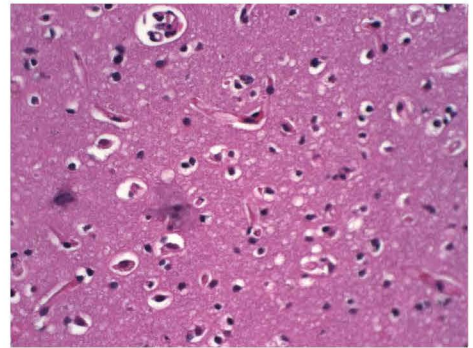

Patient 4

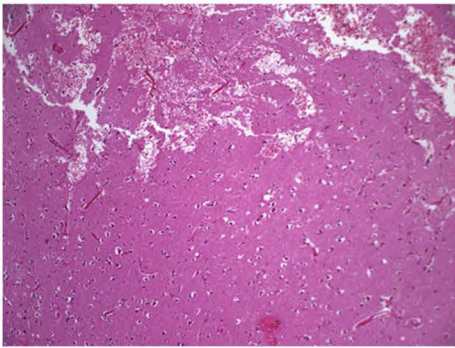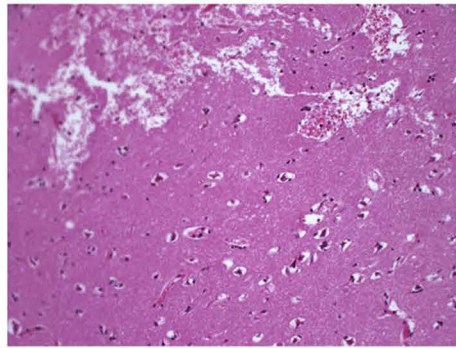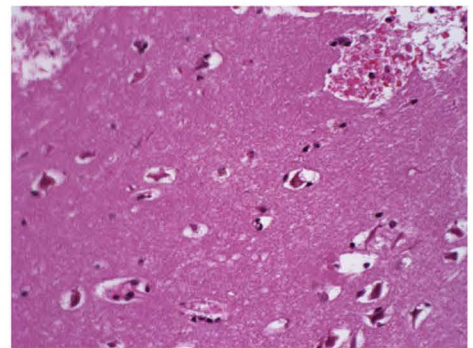

Patient 5

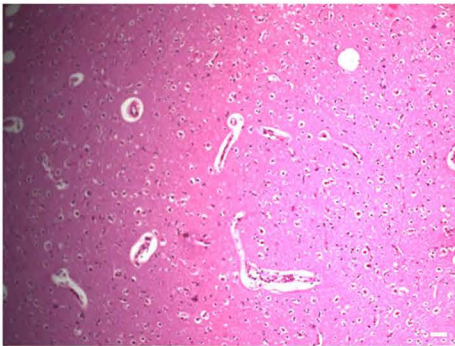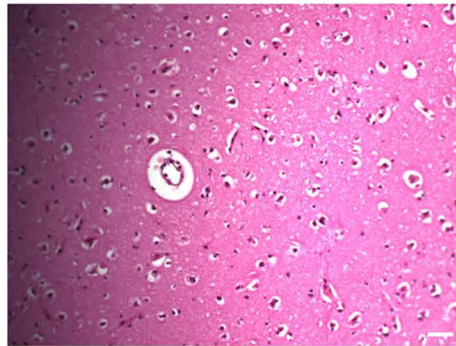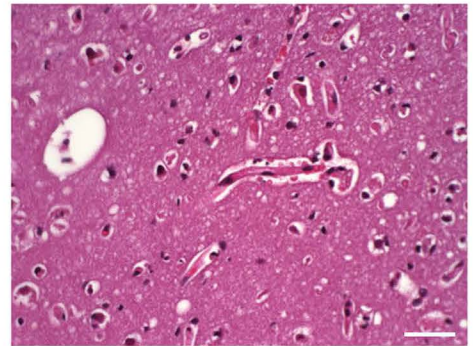



## Supplemental Figure S2

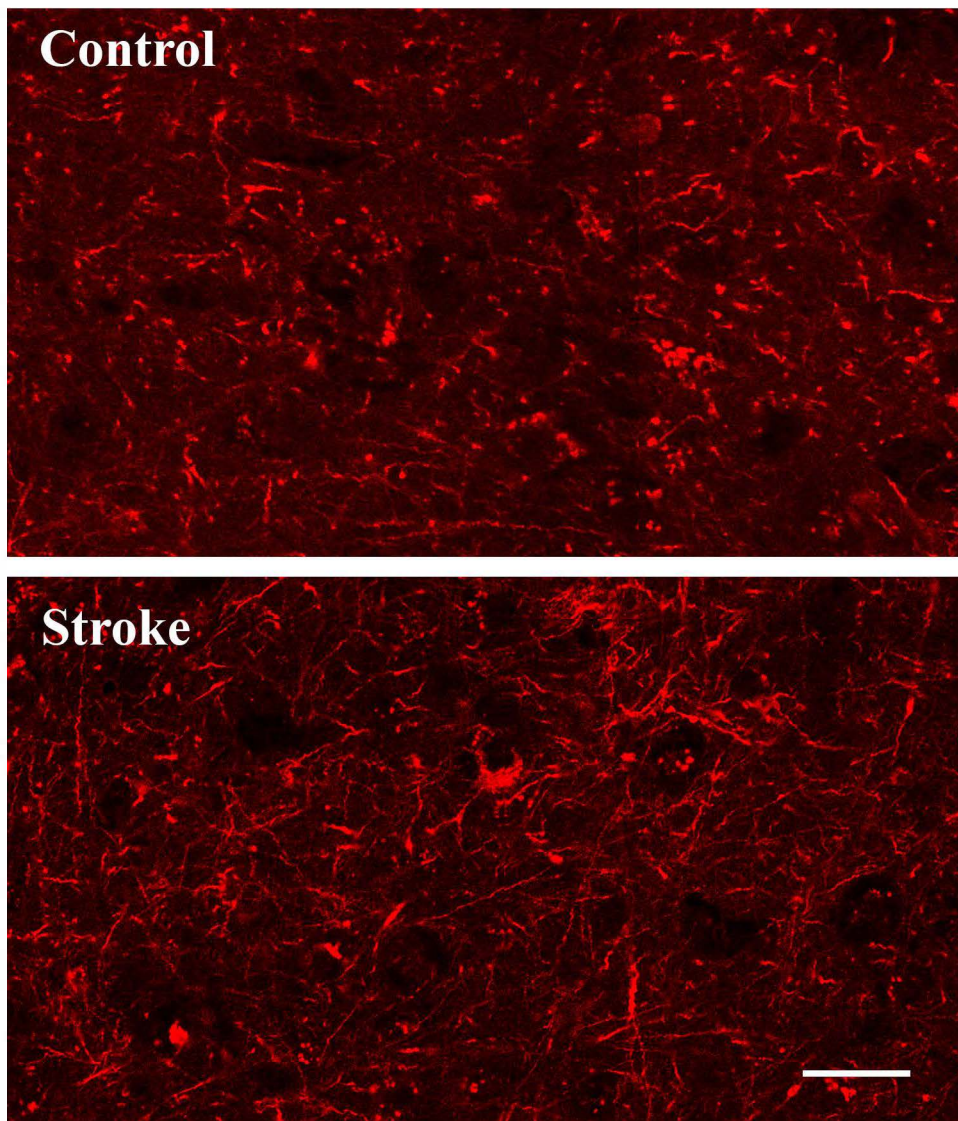

## Supplemental Figure S3

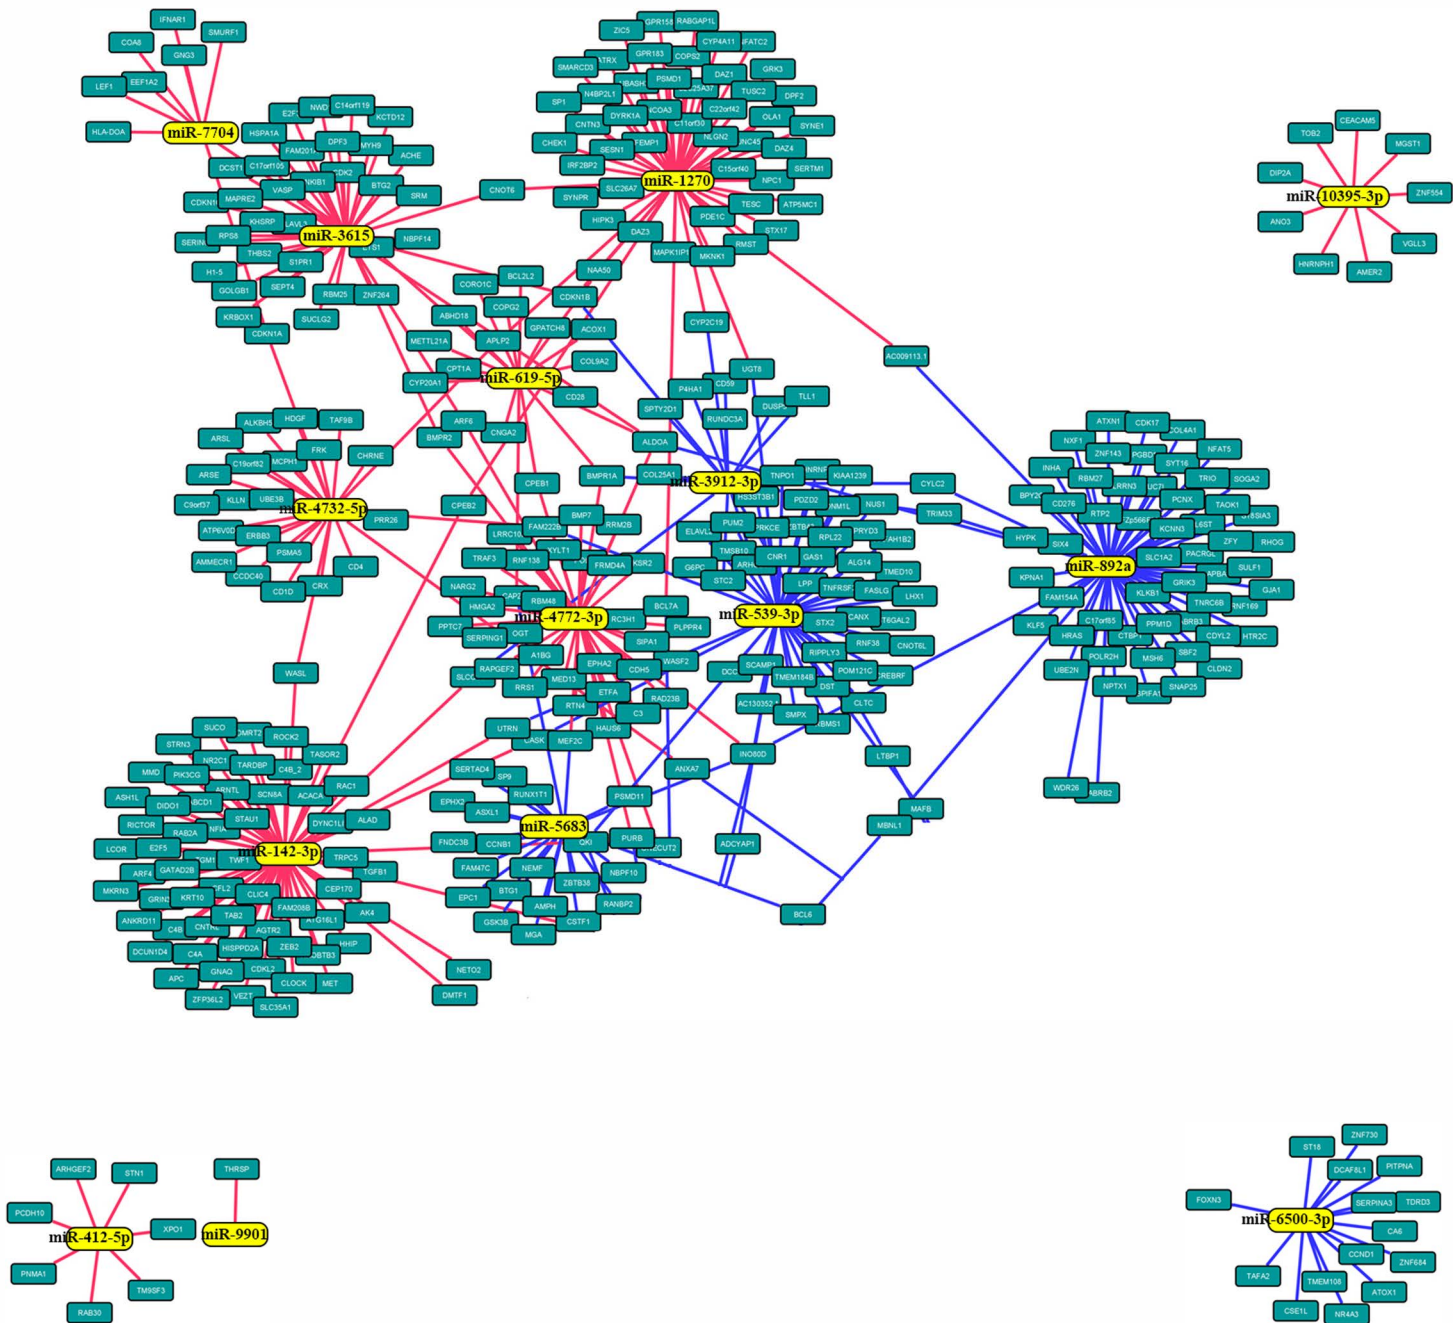

## **Online Supplemental Figure Legends**

### **Supplemental Figure S1.** Morphology of human stroke brain temporal lobe tissue

Representative images of the tissue from 5 different stroke patients, 10x, 20x, and 40x magnifications. HE staining. Bars: 50  $\mu$ m.

### **Supplemental Figure S2.** Visualization of neuronal network in human brain tissue

Immunofluorescence staining with pan-neuronal marker antibody, temporal lobe tissue. A: non-stroke control sample; B: stroke tissue sample. Bar: 50  $\mu$ m.

### **Supplemental Figure S3.** Target genes regulated by newly identified dysregulated miRNAs

Diagram demonstrating newly detected significantly differentially expressed miRNAs and selected experimentally verified and predicted target genes. Note that number of miRNAs share the common target genes. Lines show the connections between the upregulated (red lines) and downregulated (blue lines) miRNAs with their target genes.
